# Supplementary material
Source: PubMed Central journal article supplement (PMC134593)

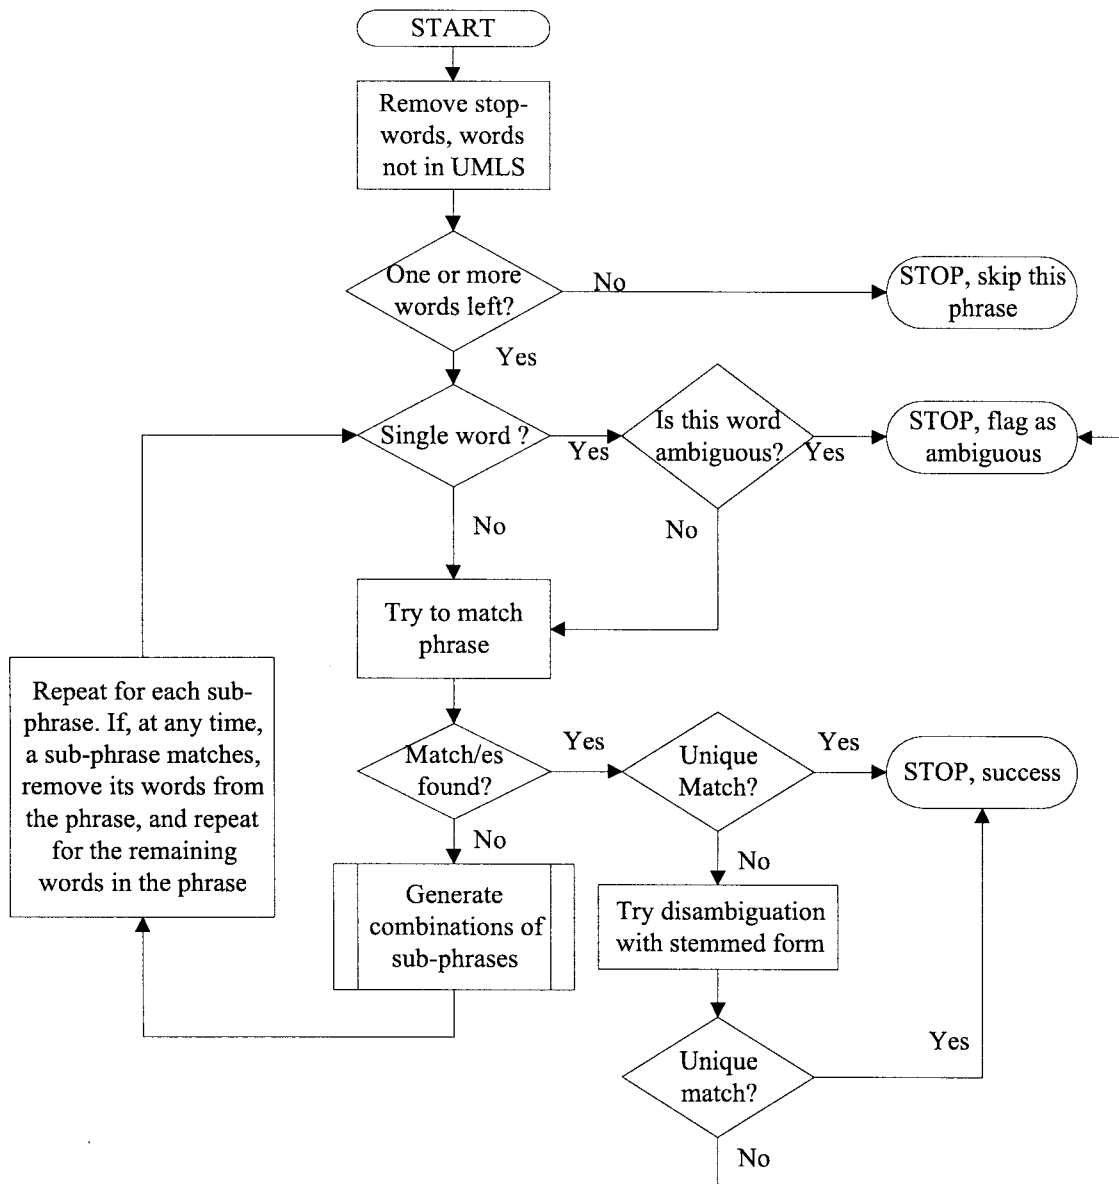

Supplement: 0080080s6.pdf [file 0080080s6.pdf]
